# Supplementary material for: Sirtuin 2 Dysregulates Autophagy in High-Fat-Exposed Immune-Tolerant Macrophages
Source: Cells. 2021 Mar 26;10(4):731. doi: 10.3390/cells10040731 (PMC8066127; doi:10.3390/cells10040731)
Supplement: Supplementary file 1 [file cells-10-00731-s001.pdf]

Article

# Sirtuin 2 Dysregulates Autophagy in High-Fat Exposed Immune Tolerant Macrophages

Sanjoy Roychowdhury <sup>1,†</sup>, Anugraha Gandhirajan <sup>1,†</sup>, Christopher Kibler <sup>1</sup>, Xianfeng Wang <sup>2</sup> and Vidula Vachharajani <sup>1,3,\*</sup>

Supplementary figures:

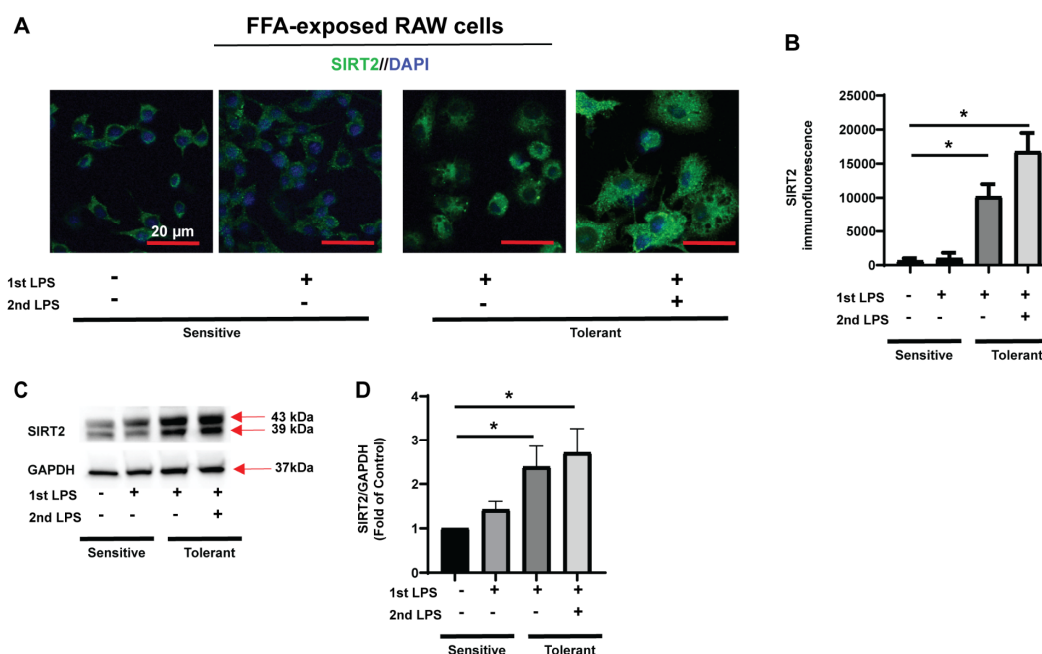

**Figure S1.** SIRT2 expression is increased in FFA-exposed tolerant RAW cells. Stearic acid (free fatty acid: FFA) exposed RAW264.7 cell macrophages (RAW) were stimulated with either one or two doses of LPS. **A.** Representative images of SIRT2 (green) and DAPI (blue) immunostaining in FFA-exposed sensitive and tolerant RAW cells following one or two doses of LPS stimulation as indicated. **B.** Fluorescence quantification of SIRT2 immunostaining in FFA-exposed sensitive and tolerant RAW cells ( $n = 5$ ;  $* p < 0.05$ ). **C.** SIRT2 protein expression was detected by Western Blot in FFA-exposed RAW cells following one or two doses of LPS stimulation as indicated. GAPDH was used as the loading control. **D.** Western blot image quantification using image-J software ( $n = 3$  each group;  $* p < 0.05$ ). SIRT2 protein expression was normalized to GAPDH.

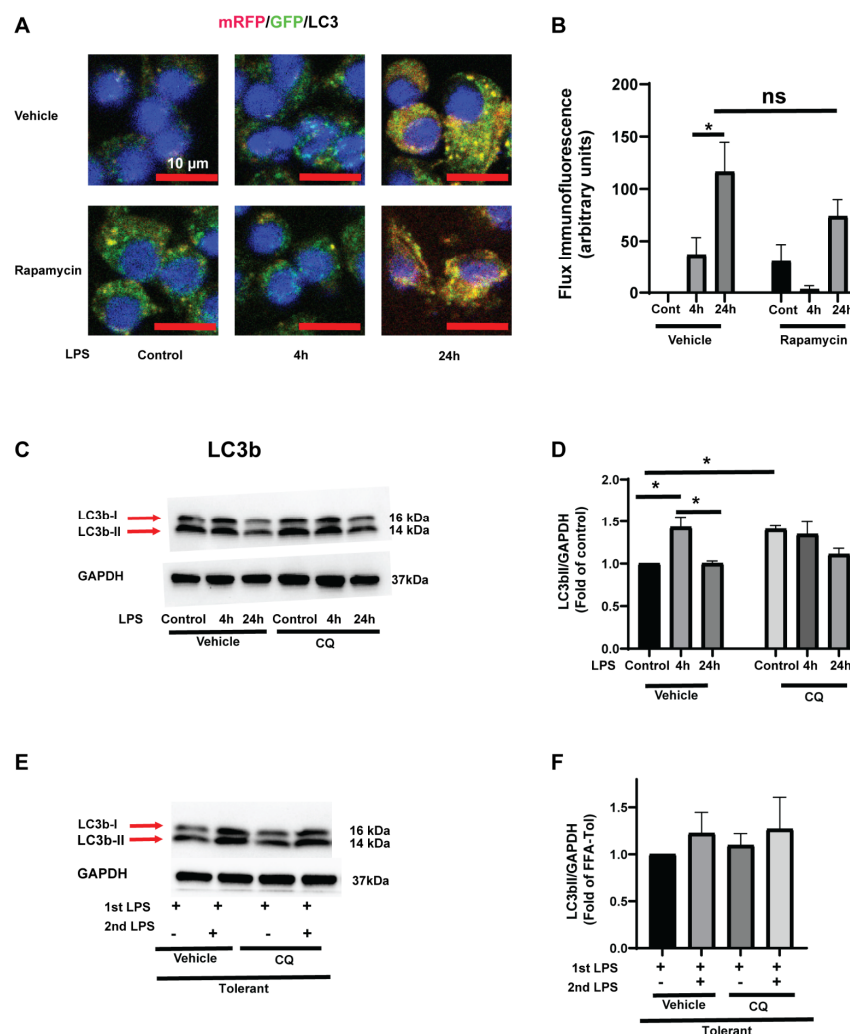

**Figure S2.** Autophagosome accumulates in FFA-exposed tolerant RAW cells. Stearic acid (free fatty acid: FFA) exposed RAW264.7 cell macrophages (RAW) were stimulated with either one or two doses of LPS as indicated time points. **A.** To induce autophagic clearance, cells were treated with rapamycin (100 ng/ml, 24 h). Representative images of autophagosome formation (yellow puncta) with mRFP-GFP-LC3 transduction in FFA-exposed sensitive RAW cells. **B.** Fluorescence quantification of mRFP/GFP fluorescence in FFA-exposed RAW cells in control (without LPS) and LPS. **C.** To inhibit autophagy, cells were exposed to chloroquine (90  $\mu$ M, 24 h). Loading control: GAPDH. LC3b protein expression was detected in the cytosolic extract by Western Blot. **D.** Western blot image quantification of LC3b-II using image-J software ( $n = 5$  blots;  $* p < 0.05$ ). **E.** FFA exposed tolerant RAW cells were treated with autophagy inhibitor CQ (90  $\mu$ M) or vehicle and incubated for 24h and stimulated with or without LPS as indicated. LC3b protein expression was detected in the cytosolic extract by Western Blot. **F.** Western blot image quantification of total alpha-tubulin using image-J software ( $n = 5$  blots;  $* p < 0.05$ ).

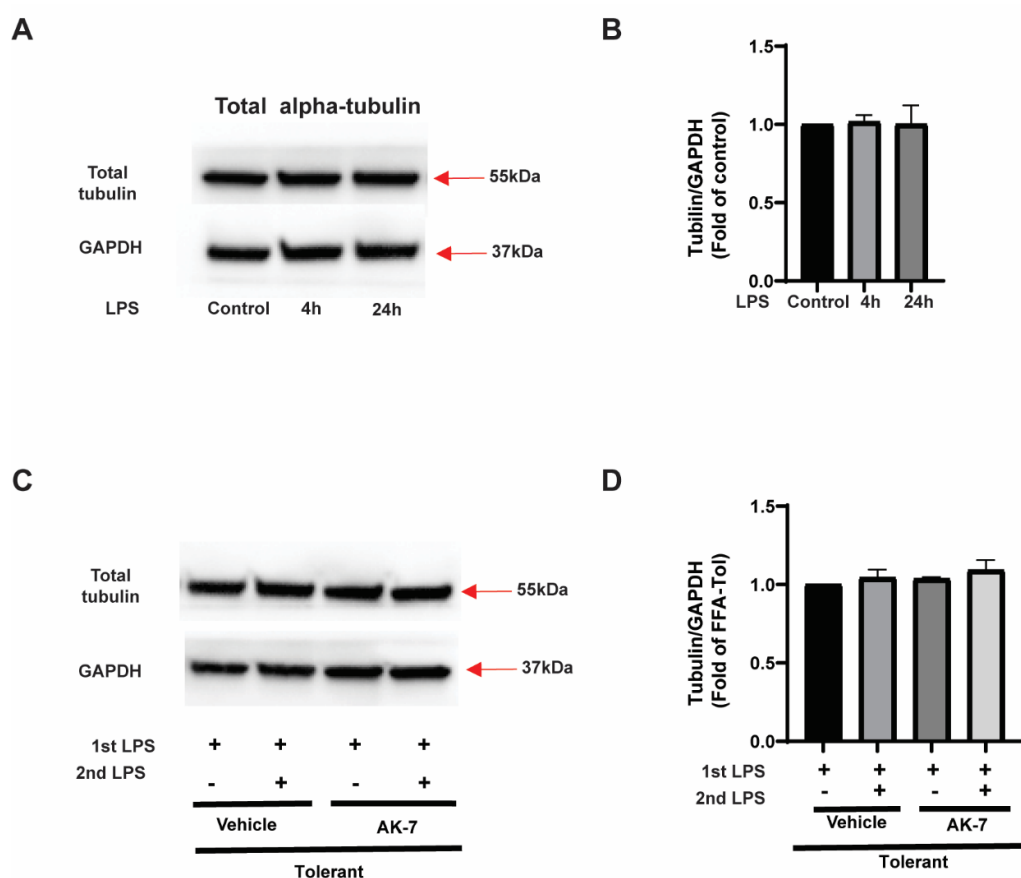

**Figure S3.** Total alpha-tubulin expression in sensitive and tolerant macrophages. Stearic acid (free fatty acid: FFA) exposed sensitive and tolerant RAW264.7 cell macrophages (RAW) were stimulated with or without LPS for 4h or 24 h. Loading control: GAPDH. **A.** Total alpha-tubulin protein expression was detected in the cytosolic extract by Western Blot. **B.** Western blot image quantification using image-J software ( $n = 5$  blots;  $* p < 0.05$ ). **C** FFA exposed tolerant RAW cells were treated with SIRT2 inhibitor AK-7 (25  $\mu$ M) or vehicle (DMSO; equal volume) and incubated further for 20h and stimulated with or without LPS as indicated. Total alpha-tubulin protein expression was detected in the cytosolic extract by Western Blot. **D.** Western blot image quantification of total alpha-tubulin using image-J software ( $n = 5$  blots;  $* p < 0.05$ ).

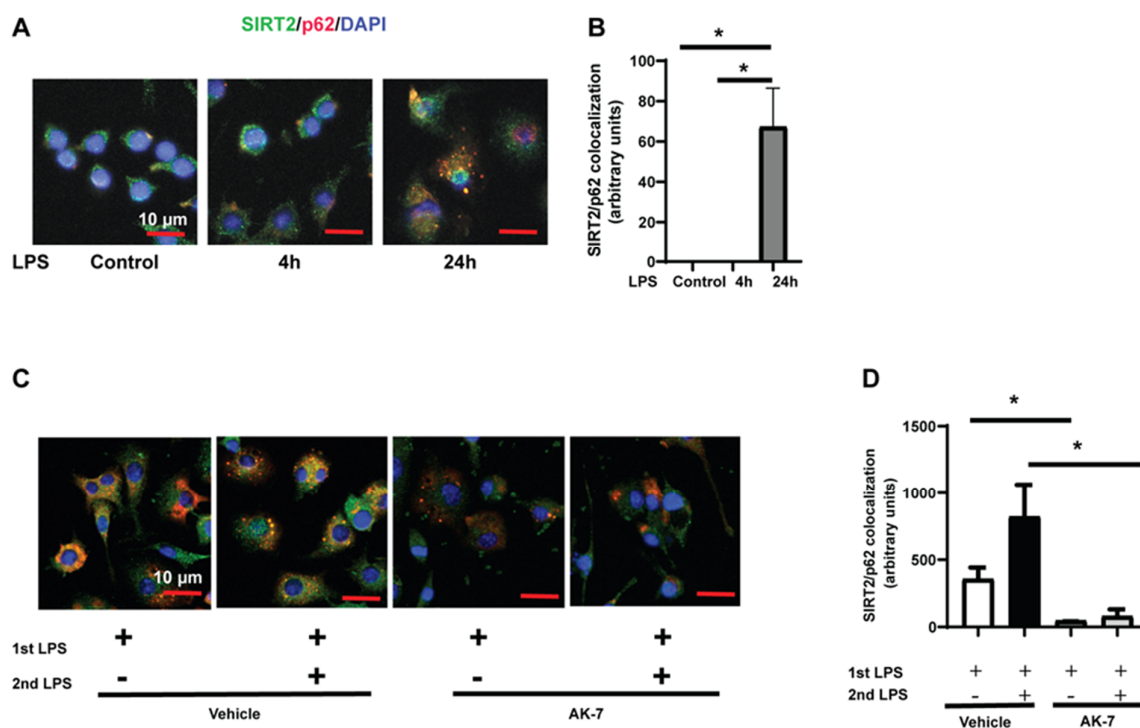

**Figure S4.** Co-localization of SIRT2 and p62 in sensitive and tolerant macrophages. Stearic acid (free fatty acid: FFA) exposed sensitive and tolerant RAW264.7 cell macrophages (RAW) were stimulated with or without LPS as indicated. **A.** Representative Images of SIRT2 (green) and p62 (red) double immunostaining in FFA-exposed sensitive and tolerant RAW cells following LPS stimulation as indicated. Yellow color indicates co-localization of SIRT2 and p62. **B.** Fluorescence quantification of SIRT2 and p62 double immunostaining in FFA-exposed sensitive and tolerant RAW cells. **C.** FFA exposed tolerant RAW cells were treated with SIRT2 inhibitor AK-7 (25  $\mu$ M) or vehicle (DMSO; equal volume) and incubated further for 20h and stimulated with or without LPS as indicated. Representative Images of SIRT2 (green) and p62 (red) double immunostaining in FFA-exposed sensitive and tolerant RAW cells following LPS stimulation as indicated. **D.** Fluorescence quantification of SIRT2 and p62 double immunostaining in FFA-exposed tolerant RAW cells in presence or absence of AK-7.
